# Supplementary material
Source: PubMed Central journal article supplement (PMC5512870)
Supplement: NIHMS621153-supplement-Supplementary_Table_1.pdf [file NIHMS621153-supplement-Supplementary_Table_1.pdf]

**Table S1. Clinicopathological characteristics of prostate cancer cases**

| <b>Clinicopathologic feature</b> | <b>Number of cases (%)</b> |
|----------------------------------|----------------------------|
| <b>Preoperative PSA (ng/ml)</b>  |                            |
| 0-10                             | 72 (86.75)                 |
| 10-20                            | 9 (10.84)                  |
| ≥20                              | 2 (2.41)                   |
| <b>Gleason grade</b>             |                            |
| 3+3                              | 18 (21.69)                 |
| 3+4                              | 47 (56.62)                 |
| 4+3                              | 12 (14.46)                 |
| ≥4+4                             | 6 (7.23)                   |
| <b>Pathologic stage</b>          |                            |
| T2                               | 6 (7.32)                   |
| T2b                              | 59 (71.95)                 |
| T3a                              | 9 (10.98)                  |
| T3b                              | 7 (8.54)                   |
| T4                               | 1 (1.22)                   |
