# Supplementary material
Source: PubMed Central journal article supplement (PMC5512870)
Supplement: NIHMS621153-supplement-Supplementary_Table_2.pdf [file NIHMS621153-supplement-Supplementary_Table_2.pdf]

**Table S2. Clinicopathological associations of 5q21 deletion**

|                                                 | <b>Clinicopathologic feature</b>     | <b>P-value</b>    |
|-------------------------------------------------|--------------------------------------|-------------------|
| <b><i>CHD1</i> deletion</b>                     | Preoperative PSA (<10 vs. ≥10 ng/ml) | 0.21 <sup>b</sup> |
|                                                 | Gleason grade (≤T2 vs. ≥T3)          | 1 <sup>b</sup>    |
|                                                 | Pathologic stage (≤T2 vs. ≥T3)       | 0.38 <sup>b</sup> |
|                                                 | PSA recurrence-free survival         | 0.29 <sup>c</sup> |
| <b><i>CHD1</i> under-expression<sup>a</sup></b> | Preoperative PSA (<10 vs. ≥10 ng/ml) | 1 <sup>b</sup>    |
|                                                 | Gleason grade (≤T2 vs. ≥T3)          | 0.14 <sup>b</sup> |
|                                                 | Pathologic stage (≤T2 vs. ≥T3)       | 0.27 <sup>b</sup> |
|                                                 | PSA recurrence-free survival         | 0.45 <sup>c</sup> |

<sup>a</sup>Defined as more than 1 standard deviation below the mean expression level

<sup>b</sup>Fisher's exact test

<sup>c</sup>Log-rank test
