# Supplementary material
Source: PubMed Central journal article supplement (PMC5512870)
Supplement: NIHMS621153-supplement-Supplementary_Table_3.pdf [file NIHMS621153-supplement-Supplementary_Table_3.pdf]

**Table S3. PCR primers for sequencing of *CHD1***

| <b>Exon</b> | <b>Forward primer</b>       | <b>Reverse primer</b>       | <b>T<sub>m</sub><sup>a</sup></b> |
|-------------|-----------------------------|-----------------------------|----------------------------------|
| 1           | tgactgtgaagaaaattcatctg     | gaggaaaacctgaaaactctgc      | 58                               |
| 2           | atgatttggggcttctgc          | aaaccaatcctctaaatttccc      | 58                               |
| 3           | ttgaggcagtaaagatgggtgg      | ttaactgattcagcagcatgctc     | 58                               |
| 4           | aaaaggcttcacaagtctg         | ctcctttggcaacaatttc         | 58                               |
| 5           | gcgaatatagtttggtgattg       | tgacttagatctaggaaagtgcaaag  | 58                               |
| 6           | atggctcagtttggtgctg         | actgtgccccagccctctac        | 58                               |
| 7           | ttcccataagtttctatacccc      | tgtggacaagacagccaac         | 58                               |
| 8           | caaatagtgttgggatggg         | actgttttagtaagcaagctactg    | 58                               |
| 9           | agatagctaaatcttactgttagcc   | tgaaatcaggatccaactcttg      | 58                               |
| 10          | aaagctgaggcttcatcttttag     | gaatcctgtattggtaaattcttactc | 58                               |
| 11          | gcattagtgattaagtcttagccag   | tgggagacagagtgaaaccc        | 58                               |
| 12          | ggacaacaagagcaaaactctg      | tgctgactcacgatttaggc        | 58                               |
| 13          | ttaataattgagttcagattaaatggg | aatctgtgatctaacttttagggc    | 56                               |
| 14          | agtattttgttataaatgactcccc   | gcaggacacagacatggaag        | 58                               |
| 15          | tttactttggactatcgttggc      | aaagcattgagccattttcg        | 58                               |
| 16          | aggtgtgatatggcaaaggg        | tccaatcaagaaaattctgcc       | 58                               |
| 17          | ttagcaaaggacatgcttcac       | caaaggtggctaaccactc         | 58                               |
| 18          | ccatactgctttagctcagaaaatc   | ttggtaaaccaagctcctcag       | 58                               |
| 19          | ttgtgtgccagtttaggc          | ttcctcaatgatctacagtatgtaac  | 58                               |
| 20-21       | aacttctcatgtaactgttgaaggg   | cagcaatcttctgattatgc        | 58                               |
| 22          | cctaaggagcatgccagttc        | acaacaaaaatcagcccagg        | 58                               |
| 23          | aagattccgaccatctttataatg    | tcaaataacagatttgccctcttc    | 58                               |
| 24          | ttaatttacctgtcttacctggtg    | tttgtaaattgccgattaaaagc     | 58                               |
| 25          | ttgtctaccacattgtcctgg       | cagacagaaaaatgtcagggg       | 58                               |
| 26          | aagtaatagcatcagttgcttgg     | tttcaaaactagccaataacacc     | 58                               |
| 27          | ttatttgaagttctaatactcagc    | tccagatttcattatttccaac      | 58                               |
| 28          | ttcattttgaaagataatctgaggg   | catggtgaagtaaacaaaatttacc   | 58                               |
| 29          | tgtctagcccttgatttaatg       | acatgccatattcccttcc         | 58                               |
| 30          | tttgcctttgtgctattgg         | cccttcaaatttcaaacattgc      | 58                               |
| 31          | aaggaggtagacctgtgaatttag    | acctaaactcagaatcaggaaag     | 58                               |
| 32          | gtttgtgcctggaggggaag        | tctgtatttataactgctctg       | 58                               |
| 33          | aaaatatctttagtcatgggacaag   | aactgagaaaaggatgattaaaagg   | 58                               |
| 34          | tgtatttgggaaccgattttg       | ttggctgacaggtcaaatacag      | 58                               |
| 35          | taggggtttgtatggttcg         | agacctgcatcctggaaag         | 58                               |

<sup>a</sup>PCR conditions: Amplifications were performed in a 50µl volume of 1x Pfx Amplification buffer, 1x Enhancer buffer, 1mM MgSO<sub>4</sub>, 0.3mM dNTPs, 0.3µM each of forward and reverse primers, and 1.0 U Platinum Pfx DNA Polymerase (Invitrogen). Cycles were an initial denaturation of 94°C for 5 min, followed by 35 cycles at 94°C for 30 sec, T<sub>m</sub> for 30 sec, and 68°C for 30 sec.
