# Supplementary material
Source: PubMed Central journal article supplement (PMC5512870)

Figure S1

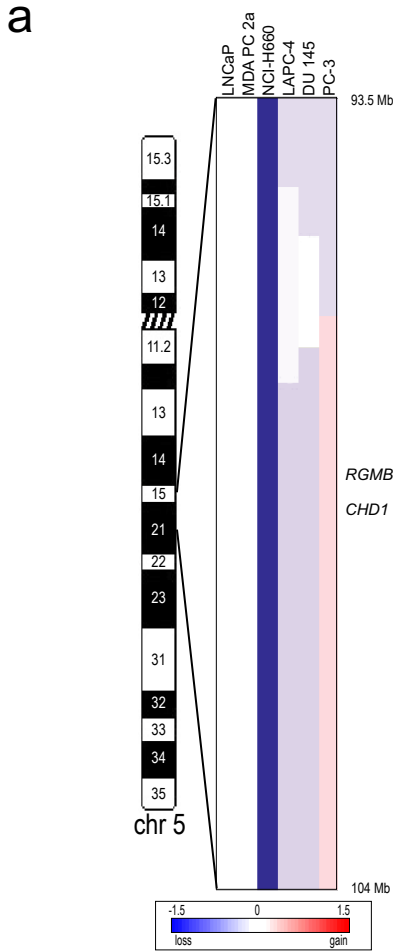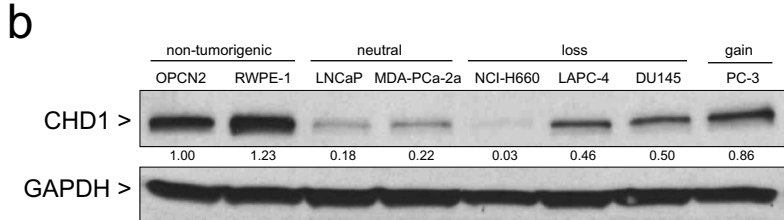

Supplement: NIHMS621153-supplement-Supplementary_Figure_1.pdf [file NIHMS621153-supplement-Supplementary_Figure_1.pdf]

Figure S2

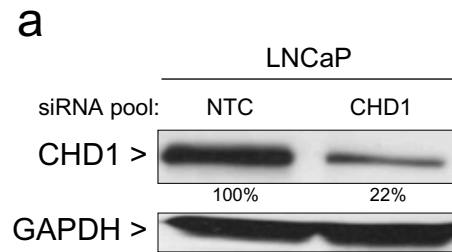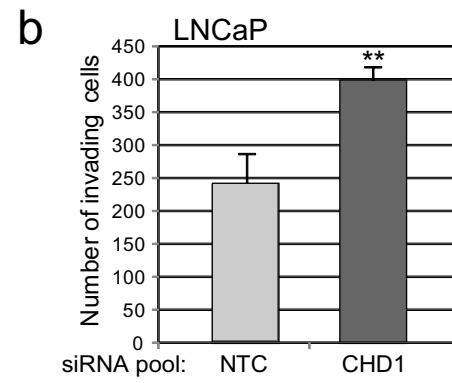

Supplement: NIHMS621153-supplement-Supplementary_Figure_2.pdf [file NIHMS621153-supplement-Supplementary_Figure_2.pdf]

Figure S3

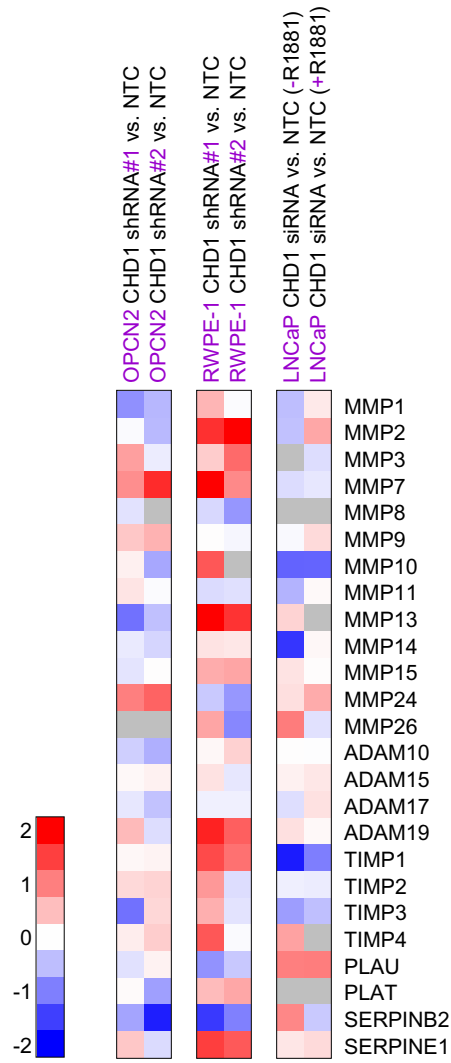

Supplement: NIHMS621153-supplement-Supplementary_Figure_3.pdf [file NIHMS621153-supplement-Supplementary_Figure_3.pdf]
